# Supplementary material
Source: publisher site journal article supplement (https://www.dovepress.com/article/220327)
Supplement: Supplementary file 1 [file get_supplementary_file.php]

Table 1. Association between pCR and metastatic relapse in breast cancer patients with neoadjuvant chemotherapy

|  | n (%) | Metastatic relapse (n=13) | No relapse (n=17) | *P* (χ2) |
| --- | --- | --- | --- | --- |
| Total | 30 |  |  |  |
| pCR | 8 (27%) | 2 | 6 |  |
| Non-pCR | 22 (73%) | 11 | 11 | 0.407 |
| HR positive | 15 |  |  |  |
| pCR | 2 (13%) | 1 | 1 |  |
| Non-pCR | 13 (87%) | 2 | 11 | 0.371 |
| HR negative | 15 |  |  |  |
| pCR | 6 (40%) | 1 | 5 |  |
| Non-pCR | 9 (60%) | 9 | 0 | **0.002** |

Abbreviations: n, number; NAC, neoadjuvant chemotherapy; HR, hormone receptor; pCR, pathologic complete response; *P*, p value; the bold value, p < 0.05
